# Supplementary material
Source: PubMed Central journal article supplement (PMC3428161)
Supplement: cn100012x_si_001.pdf [file cn100012x_si_001.pdf]

## Supplementary Material

**Supplementary Table 1:** Names and accession numbers for all identified *M. musculus* Rho-GEFs, Rho-GAPs, and Rho-GTPases expressed in the PSD. Gene Symbol, Gene Name, MGI ID, and Entrez ID represent the official names and identifiers for each gene as designated by the naming authority. MGI ID and Entrez ID entries are hyperlinked to the specific gene page the Mouse Genome Informatics (MGI) and NCBI (GenBank) websites. Table includes Synonyms, UniGene IDs, UniProt ID, UniProt Accession, Ensemble IDs, and RefSeq IDs.

**Supplementary Table 2:** Modifications to SMART structures of Rho-GEFs in Figure 1. Features changed from SMART database (<http://smart.embl-heidelberg.de/>) structures are provided for each Rho-GEF in Figure 1. Table includes the accession number used in the SMART query and provides a reference in support of the changes. Accession numbers are from the UniProt (<http://www.uniprot.org/>) and NCBI (<http://www.ncbi.nlm.nih.gov/protein>) databases. SMART designates segments of low compositional complexity, all of which were removed from the gene structures in Figure 1.
