# Supplementary material
Source: PubMed Central journal article supplement (PMC3428161)
Supplement: cn100012x_si_003.pdf [file cn100012x_si_003.pdf]

**Supplementary Table 2:** Modifications to SMART structures of Rho-GEFs in Figure 1.

| Gene Name             | Features changed from SMART                                                                                                                         | Accession used in SMART query                                                           | Reference |
|-----------------------|-----------------------------------------------------------------------------------------------------------------------------------------------------|-----------------------------------------------------------------------------------------|-----------|
| Arhgef2/Lfc/GEF-H1    | N/A                                                                                                                                                 | ARHG2_MOUSE (Q60875)                                                                    | (1)       |
| Arhgef7/ $\beta$ -Pix | 1. Addition of C-terminal PDZ-binding motif to $\beta$ 1-Pix isoform                                                                                | $\beta$ 1-Pix: NP_059098.2 (GenBank FASTA)<br>$\beta$ 2-Pix: EDL22084.1 (GenBank FASTA) | (2)       |
| Arhgef9/Collybistin   | 1. Collybistin-I isoform of <i>Arhgef9</i> gene<br>2. Addition of missing C-terminal coiled-coil motif                                              | ARHG9_MOUSE (Q3UTH8)                                                                    | (3)       |
| Bcr                   | 1. Addition of C-terminal PDZ-binding motif                                                                                                         | BCR_MOUSE (Q6PAJ1)                                                                      | (4)       |
| Itsn1/Intersectin-L   | 1. Intersectin-L isoform of <i>Itsn1</i> gene                                                                                                       | ITSN1_MOUSE (Q9Z0R4)                                                                    | (5)       |
| Kalrn                 | 1. Kalirin7 isoform of <i>Kalrn</i> gene<br>2. Addition of 2 spectrin-like repeats; bring total to 9<br>3. Addition of C-terminal PDZ-binding motif | A2CG53_MOUSE (A2CG53)                                                                   | (6)       |
| Ngef/Ephexin1         | N/A                                                                                                                                                 | NGEF_MOUSE (Q8CHT1)                                                                     | (7)       |
| Rasgrf2               | 1. Addition of C-terminal PDZ-binding motif                                                                                                         | P70392_MOUSE (P70392)                                                                   | (8)       |
| Tiam1                 | 1. Addition of C-terminal PDZ-binding motif                                                                                                         | TIAM1_MOUSE (Q60610)                                                                    | (9)       |
| Trio                  | 1. Trio9S isoform of <i>Trio</i> gene<br>2. Addition of 3 spectrin-like repeats; bring total to 9                                                   | TRIO_MOUSE (Q0KL02-3)                                                                   | (10)      |

### References

1. Glaven, J. A., Whitehead, I., Bagrodia, S., Kay, R., and Cerione, R. A. (1999) The Dbl-related protein, Lfc, localizes to microtubules and mediates the activation of Rac signaling pathways in cells. *J. Biol. Chem.* 274, 2279-2285.
2. Koh, C. G., Manser, E., Zhao, Z. S., Ng, C. P., and Lim, L. (2001) Beta1PIX, the PAK-interacting exchange factor, requires localization via a coiled-coil region to promote microvillus-like structures and membrane ruffles. *J. Cell Sci.* 114, 4239-4251.
3. Kins, S., Betz, H., and Kirsch, J. (2000) Collybistin, a newly identified brain-specific GEF, induces submembrane clustering of gephyrin. *Nature Neurosci.* 3, 22-29.
4. Radziwill, G., Erdmann, R. A., Margelisch, U., and Moelling, K. (2003) The Bcr kinase downregulates Ras signaling by phosphorylating AF-6 and binding to its PDZ domain. *Mol. Cell Biol.* 23, 4663-4672.
5. Pucharcos, C., Fuentes, J. J., Casas, C., de la Luna, S., Alcantara, S., and Pritchard, M. (1999) Alu-splice cloning of human Intersectin (ITSN), a putative multivalent binding protein expressed in proliferating and differentiating neurons and overexpressed in Down syndrome. *Eur. J. Hum. Genet.* 7, 704-712.
6. Johnson, R. C., Penzes, P., Eipper, B. A., and Mains, R. E. (2000) Isoforms of kalirin, a neuronal Dbl family member, generated through use of different 5'- and 3'-ends along with an internal translational initiation site. *J. Biol. Chem.* 275, 19324-19333.
7. Shamah, S. M., Lin, M. Z., Goldberg, J. L., Estrach, S., Sahin, M., Hu, L., Bazalakova, M., Neve, R. L., Corfas, G., Debant, A., and Greenberg, M. E. (2001) EphA receptors regulate growth cone dynamics through the novel guanine nucleotide exchange factor ephexin. *Cell* 105, 233-244.
8. Garcia-Mata, R. and Burridge, K. (2007) Catching a GEF by its tail. *Trends Cell Biol.* 17, 36-43.
9. Songyang, Z., Fanning, A. S., Fu, C., Xu, J., Marfatia, S. M., and Cantley, L. C. (1997) Recognition of unique carboxyl-terminal motifs by distinct PDZ domains. *Science* 275, 73-77.
10. McPherson, C. E., Eipper, B. A., and Mains, R. E. (2005) Multiple novel isoforms of Trio are expressed in the developing rat brain. *Gene* 347, 125-135.
